# Supplementary material
Source: PubMed Central journal article supplement (PMC5462058)
Supplement: supp_pp.17.00150_PP2017-SC-00150DR1_Supplemental_Material.pdf [file supp_pp.17.00150_PP2017-SC-00150DR1_Supplemental_Material.pdf]

## 1 Supplemental Materials

2

## 3 Supplemental Methods

4

### 5 *Plant material*

6 Experiments were performed on three 8-year-old individuals of *M. glyptostrobooides*, grown  
7 under glasshouse conditions for 10 weeks following a dormant overwintering period outside.  
8 Growth conditions were 16 h days, with supplemental light from sodium vapour lamps over  
9 the morning and evening providing a minimum of  $300 \mu\text{mol m}^{-2} \text{s}^{-1}$  PAR at the leaf surface.  
10 Day/night temperatures were  $23^{\circ}\text{C}/15^{\circ}\text{C}$  respectively. Plants were grown in 20 L pots of  
11 8:2:1 medium of composted pine bark, coarse river sand and peat moss and watered daily.  
12 Once a week, plants were supplemented with liquid fertiliser (Aquasol; Hortico Ltd).

13

### 14 *Determination of the $g_s$ vs. $\Psi_l$ relationship*

15 In total, six branches were excised from the three individuals and allowed to slowly desiccate  
16 on a laboratory bench. At intervals, initially every 20-30 min but at longer intervals as  
17 branches dried out,  $g_s$  of a short shoot was measured using an infrared gas analyser (LI-6400;  
18 LI-COR Biosciences). Chamber conditions were set at a light intensity of  $1000 \mu\text{mol m}^{-2} \text{s}^{-1}$   
19 PAR (above light saturation for  $g_s$  in *M. glyptostrobooides*), chamber temperature of  $22^{\circ}\text{C}$  and  
20  $D$  of 1.5 kPa, the same as external conditions. Short shoots outside the chamber were  
21 illuminated with a customised fibre optic light shower. At the same time as  $g_s$  was measured,  
22 leaf water potential of an excised neighbouring short shoot was measured using a Scholander  
23 pressure chamber. The maximum duration of desiccation did not exceed 4.5 h to avoid both  
24 excessive loss of hydraulic conductivity and synthesis of ABA, the latter in *M.*  
25 *glyptostrobooides* typically synthesised after 6 h of desiccation (McAdam and Brodribb,  
26 2014).

27

### 28 *Determination of the $g_s$ vs. [ABA] relationship*

29 The data used here for the  $g_s$  vs. [ABA] relationship in leaves of *M. glyptostroboides* is  
30 identical to that in McAdam and Brodribb (2014) and so only a brief recap of the method will  
31 be included here. Stomatal sensitivity to ABA was determined by four independent methods:  
32 (1) feeding ABA into the transpiration stream of fully hydrated, excised shoots; (2)  
33 rehydrated excised shoots previously allowed to slowly bench dry up to 24 h to stimulate  
34 ABA synthesis; (3) rehydrated excised shoots of plants undergoing drought stress; (4) *in vitro*  
35 response of stomatal aperture to ABA in solution and  $g_s$  calculated using the formula of  
36 Parlange and Waggoner (1970). In all methods bar the last one, stomatal conductance was  
37 determined by gas exchange using an infrared gas analyser. For full details of all the methods  
38 and ABA sampling, extraction, purification and quantification see McAdam and Brodribb  
39 (2014).

40

#### 41 *Shoot excision in air followed by rehydration by recutting underwater*

42 Dynamic traces of  $g_s$  to short term changes in plant water status caused by excision in air to  
43 disrupt the hydraulic supply, followed by recutting underwater to reconnect hydraulic supply  
44 were identical to those in McAdam and Brodribb (2014), but will be described again here as  
45 the method is important for interpreting the model. Three branches were excised from the  
46 plants and after removing the periderm around the cut end of the shoots to avoid xylary  
47 blockages by resin, the branches were recut under resin-filtered deionised water. Leaves from  
48 a short shoot approximately halfway along the branch were enclosed in the chamber of an  
49 infrared gas analyser, with chamber conditions at a light intensity of  $1500 \mu\text{mol m}^{-2} \text{s}^{-1}$  PAR,  
50  $D$  of approximately 1.2 kPa and chamber temperature of  $22^\circ\text{C}$ . Gas exchange was  
51 automatically logged at intervals of 1 min. Leaves outside the chamber were illuminated with  
52 a customised fibre optic light shower, providing a minimum of  $300 \mu\text{mol m}^{-2} \text{s}^{-1}$  PAR at the  
53 leaf surface. Once a steady-state was reached (defined as less than 3% change in  $g_s$  over 8  
54 min), the cut end of the branch was removed from the water and excess water around the cut  
55 dried with paper towel to remove hydraulic supply to the branch. The branch was allowed to  
56 dehydrate and stomata close to approximately 50% of the initial  $g_s$ , at which point the branch  
57 was rehydrated by recutting the branch underwater to reconnect hydraulic supply. Samples  
58 for ABA quantification were taken at the initial steady-state, at the minimum  $g_s$  and at the  
59 final steady-state following rehydration on neighbouring short shoots.

60

61 *Rehydration following drought*

62 An individual plant was droughted by withholding water and branches sampled at 6, 10, 14  
63 and 21 days post cessation of watering. Leaves from a short shoot were enclosed in an  
64 infrared gas analyser chamber with chamber conditions at a light intensity of  $1000 \mu\text{mol m}^{-2}$   
65  $\text{s}^{-1}$  PAR,  $D$  of approximately 1.2 kPa and chamber temperature of  $22^\circ\text{C}$ . Chamber conditions  
66 and gas exchange were automatically logged at intervals of 1 min. Prior to rehydration, a  
67 tissue sample from a neighbouring short shoot was taken for ABA quantification. The branch  
68 was rehydrated by recutting the branch underwater in resin-filtered deionised water to  
69 reconnect hydraulic supply instantaneously. ABA extraction, purification and quantification  
70 were as described in McAdam and Brodribb (2014).

71

72 *Model fitting and data analysis*

73 Values for hydraulic parameters  $K$  and  $C$  used in the model were the mean values obtained by  
74 Martins et al. (2016), except for the rehydration kinetic after 21 days drought, where the leaf  
75 water potential was sufficiently low for significant hydraulic loss to have occurred (Table 1).  
76 In this case,  $K$  was calculated from the vulnerability curve in McAdam and Brodribb (2014).  
77 Values for stomatal conductance sensitivity to turgor pressure  $\chi$  were estimated from the  
78 linear region of  $g_s$  vs.  $\Psi_l$  relationships from excised leaves (slope of the relationship should be  
79  $\chi$ ; Supplemental Fig. S1; Table 1). These values were then used to fit eqn 8 to  $g_s$  vs. [ABA]  
80 data (Fig. 1), allowing  $M$ ,  $d$  and  $[\text{ABA}]_0$  to be fitted to minimise sum of squares. All  
81 parameters were used unaltered to calculate dynamic solutions for the cases of excision-  
82 rehydration (eqn 12a during dehydration, eqn 12b following rehydration) and rehydration  
83 following drought using the ABA concentrations obtained from experiment (eqn 13). In  
84 modelling the response to rehydration following drought, reconnection of hydraulic supply  
85 was taken to occur at time  $t = 0$  s.

86 Fitting the Hill equation variant of ABA dependence (eqn S19) to  $g_s$  vs. [ABA] data used  $K$ ,  
87  $C$  and  $\chi$  as above and allowed  $d$ ,  $M$ ,  $K_A$ ,  $k_3/k_1$  and  $n$  to be unconstrained while minimising the  
88 sum of squares. Fitting of the Tardieu and Davies model to  $g_s$  vs. [ABA] data required more  
89 constraints. As the Tardieu and Davies model (eqn S20) requires both [ABA] and  $\Psi_l$ , an  
90 effective  $\Psi_l$  was reconstructed from the  $g_s$  vs. [ABA] data using the known values of  $g_s$ ,  $D$   
91 and  $P_{atm}$  and the mean value for  $K$  using eqn S26. Initially  $g_{min}$ ,  $\alpha$ ,  $\beta$  and  $\delta$  were allowed to be  
92 fitted to minimise sum of squares; however, the best fit produced  $\delta > 0$ , resulting in wrong-

93 way dynamics to changes in  $\Psi_l$ . Fitted  $g_{min}$  also tended to be higher than  $g_s$  observed in some  
94 of the drier rehydration kinetics. Instead,  $g_{min}$  was set at  $0.005 \text{ mol m}^{-2} \text{ s}^{-1}$  and the Tardieu and  
95 Davies model fitted to the steady state  $g_s$  vs. [ABA] for different values of  $\delta$ . Simulations  
96 with these parameters using eqns S20, S24, S25 and S26 were then compared with the  
97 observed excision-rehydration kinetics until a good fit was obtained. Once a good parameter  
98 set was obtained, this set was used to simulate rehydration kinetics using eqns S20, S24, S25  
99 and S27.

100 The observed rehydration kinetics were compared with exponential dynamics by fitting  
101 exponential curves of the form  $g_s = A + B \exp(-t/\tau)$ , fitting by minimising the sum of squares.  
102 Fitted steady state  $g_s$  was obtained as the parameter  $A$ , while the fitted half-time was  
103 calculated from  $\tau$  as  $t_{1/2} = \tau \ln 2$ . Bounds were placed on the expected range of half-times by  
104 selecting the minimum and maximum values for  $C/K$  observed within branches and using the  
105 corresponding  $C$  in those branches, while  $\chi$  and  $D$  were kept constant. Values for  $C$  and  $K$  in  
106 these cases were:  $797.2 \text{ mmol m}^{-2} \text{ MPa}^{-1}$  and  $3.61 \text{ mmol m}^{-2} \text{ s}^{-1} \text{ MPa}^{-1}$  respectively for the  
107 minimum case;  $1525 \text{ mmol m}^{-2} \text{ MPa}^{-1}$  and  $4.51 \text{ mmol m}^{-2} \text{ s}^{-1} \text{ MPa}^{-1}$  respectively for the  
108 maximum case. Note that these do not correspond to the extremum of  $C$  and  $K$ . Half-time  
109 bounds were then calculated using eqn 9. Steady state  $g_s$  obtained by fitting the exponential  
110 curves was compared with the modelled steady state  $g_s$  using average plant parameters by  
111 performing a two-tailed paired t-test on the residuals to see whether the mean was  
112 significantly different from 0. The expected range in steady state  $g_s$  was modelled using the  
113 observed range in  $K$  and eqn 8. Maximum observed  $K$  was  $4.51 \text{ mmol m}^{-2} \text{ s}^{-1} \text{ MPa}^{-1}$ , while  
114 minimum observed was  $2.47 \text{ mmol m}^{-2} \text{ s}^{-1} \text{ MPa}^{-1}$ .

115

116

## 117 **Supplemental Model Development**

118

119 *The ABA hydraulic model*

120

121 A full derivation of the ABA hydraulic model is provided here. As mentioned in the text, the  
 122 hydraulic core of the model at the leaf level was based on inward and outward fluxes of  
 123 water, following Jones (1982):

$$124 \quad \frac{dW}{dt} = J - E \quad \text{eqn 1}$$

125 where  $W$  is the water content of the leaf per leaf area ( $\text{mol m}^{-2}$ ),  $t$  is time (s),  $J$  is the flux of  
 126 liquid water entering the leaf ( $\text{mol m}^{-2} \text{s}^{-1}$ ) and  $E$  is the flux of water vapour lost from the leaf  
 127 by transpiration ( $\text{mol m}^{-2} \text{s}^{-1}$ ).

128 Using an Ohm's Law approximation, the flux of water into the leaf can be expressed as

$$129 \quad J = K(\Psi_s - \Psi_l) \quad \text{eqn S1}$$

130 where  $K$  is the hydraulic conductivity of the leaf ( $\text{mol m}^{-2} \text{s}^{-1} \text{Pa}^{-1}$ ),  $\Psi_s$  is the source water  
 131 potential and  $\Psi_l$  is the leaf water potential (both in units of Pa).

132 Assuming well-mixed conditions, i.e. a negligible boundary layer resistance, the flux of water  
 133 out of the leaf can be expressed as

$$134 \quad E = \frac{g_s D}{P_{atm}} \quad \text{eqn S2}$$

135 where  $g_s$  is stomatal conductance ( $\text{mol m}^{-2} \text{s}^{-1}$ ),  $D$  is the vapour pressure difference (Pa) and  
 136  $P_{atm}$  is atmospheric pressure (Pa).

137 By definition of capacitance as the change in leaf water content per change in leaf water  
 138 potential and the chain rule, the rate of change of water content can be expressed in terms of  
 139 water potential as

$$140 \quad \frac{dW}{dt} = \frac{dW}{d\Psi_l} \frac{d\Psi_l}{dt} = C \frac{d\Psi_l}{dt} \quad \text{eqn S3}$$

141 Combining eqns 1, S1, S2 and S3 and dividing through by  $C$ , eqn 2 is obtained:

$$142 \quad \frac{d\Psi_l}{dt} = \frac{K}{C} (\Psi_s - \Psi_l) - \frac{g_s D}{C P_{atm}} \quad \text{eqn 2}$$

143 A more in depth expression for  $g_s$  is now required. In general, stomatal pore area and by  
 144 extension stomatal conductance is a function of both guard cell and epidermal turgor  
 145 pressures (Franks et al., 1998; Franks and Farquhar, 2007), with guard cell turgor ( $P_g$ ) acting  
 146 to open stomata while epidermal turgor pressure acting to reduce pore aperture. In  
 147 angiosperms the control of stomatal aperture can be dominated by the epidermis and is

148 known as mechanical advantage, occasionally leading to transient wrong way responses of  
149 stomata to changes in plant water status (Franks et al., 1998; Buckley et al., 2003; Buckley,  
150 2005). No mechanical advantage or wrong-way response has been observed in ferns (Franks  
151 and Farquhar, 2007; Brodribb and McAdam, 2011), while conifers appear to also exhibit no  
152 wrong-way response (McAdam and Brodribb, 2012; McAdam and Brodribb, 2014; Martins  
153 et al., 2016). It has been suggested the reduced influence of epidermal turgor on stomatal  
154 aperture in ferns, lycophytes and gymnosperms is due to greater lignification of the dorsal  
155 walls of guard cells in these lineages compared with angiosperms (McAdam and Brodribb,  
156 2014). Ignoring the influence of the epidermis, stomatal conductance was assumed to be a  
157 linear function of  $P_g$  (Cowan, 1972; Dewar, 1995; 2002; Buckley et al., 2003; Buckley, 2005)

$$158 \quad g_s = \chi(P_g - P_0) \quad \text{eqn 3}$$

159 where  $P_0$  is the guard cell turgor pressure where stomata fully close and  $\chi$  is the constant of  
160 proportionality.

161 Expressing  $P_g$  as

$$162 \quad P_g = \Psi_g + \pi_g \quad \text{eqn S4}$$

163 where  $\Psi_g$  and  $\pi_g$  are guard cell water potential and osmotic pressure respectively, eqn 3 can  
164 be expressed in terms of water potential as

$$165 \quad g_s = \chi(\Psi_g + \pi_g - P_0) \quad \text{eqn S5}$$

166 A treatment of guard cell water relations is now required. Although it has been suggested the  
167 guard cell hydraulic connection with the rest of the plant occurs via the vapour phase (Peak  
168 and Mott, 2011), a liquid phase hydraulic connection was favoured in the model. Meidner  
169 (1975) suggested a major proportion of total evaporative loss of water into the atmosphere  
170 occurred through the guard cells, a process known as peristomatal transpiration. This  
171 assumption has been used in the models of Dewar (1995; 2002), while Buckley et al. (2003)  
172 allowed for the division of evaporation between the epidermis and guard cells. Provided some  
173 transpiration occurs directly from guard cells, a water potential gradient will occur between  
174 the guard cells and the rest of the leaf. However, guard cells possess thick cuticles on the  
175 exterior surface and in the throat of the pore, and it would appear unfavourable for the plant  
176 to be losing most of its water through peristomatal transpiration. It was therefore assumed  
177 that most evaporation occurred within the mesophyll. Moreover, it was assumed there was

178 negligible hydraulic resistance between the rest of the leaf and the guard cells. Both  
179 assumptions are consistent with a previous iterative hydraulic model that successfully  
180 predicted dynamics to changes in water status in ferns and conifers (Brodribb and McAdam,  
181 2011; McAdam and Brodribb, 2014; Martins et al., 2016). The assumptions of a negligible  
182 resistance between the guard cell and the rest of the leaf and negligible transpiration  
183 occurring directly from the guard cells leads to

$$184 \quad \Psi_g = \Psi_l \quad \text{eqn S6}$$

185 In the light, the guard cell turgor pressure is higher than the turgor pressure of the epidermis  
186 and mesophyll cells due to the active accumulation of solutes in the guard cells, such as  
187 potassium and malate (Kollist et al., 2014). In the model, the osmotic pressure in the guard  
188 cells was assumed to be composed of two components: the first consisted of the background  
189 osmotic pressure of the leaf and was assumed unaffected by active processes ( $\pi_l$ ); the second  
190 consisted of a component that could be actively regulated by metabolic processes in the guard  
191 cell, such as light-induced build up of osmolytes or the ABA-induced efflux of solutes ( $\pi_a$ ). It  
192 was also assumed changes in volume of the guard cell are small so that the osmotic pressure  
193 of the guard cell do not change appreciably with changes in volume. This last assumption is  
194 probably violated in angiosperms as guard cell volume can greatly change between closed  
195 and fully open states (Raschke, 1975), although volume change is expected to be smaller in  
196 conifers due to larger guard cell size.

197 Equation S5 then becomes

$$198 \quad g_s = \chi(\Psi_l + \pi_a + \pi_l - P_0) \quad \text{eqn S7}$$

199 and letting  $d = \pi_l - P_0$  gives eqn 4.

200 The active metabolic control of stomatal conductance occurs through  $\pi_a$ , while hydropassive  
201 control occurs through  $\Psi_l$ . In general, a description of inward and outward fluxes of  
202 osmolytes in terms of ion channel behaviour is difficult (Hills et al., 2012), while the role of  
203 osmolyte synthesis in the guard cells is still unclear (Lawson, 2009). Instead, simple  
204 expressions were used to describe the inward flux or accumulation of osmolytes in the guard  
205 cells in the light, and the outward flux of osmolytes triggered by ABA. Although both inward  
206 and outward fluxes of solutes are often driven by changes in guard cell membrane potential  
207 (Hills et al., 2012), here it was assumed both processes occurred independently. However, it  
208 will be shown that this assumption can be identical mathematically to a case where the light

209 driven influx of solutes is reduced by the presence of ABA, as expected for depolarisation of  
210 the membrane.

211 The flux of solutes into the guard cell was assumed to be proportional to the difference  
212 between the current osmotic pressure and a target osmotic pressure ( $M$ ) obtainable in the  
213 absence of ABA, set by environmental conditions such as light, temperature and carbon  
214 dioxide concentration (Kirschbaum et al., 1988; Haefner et al., 1997):

$$215 \text{ inward flux} = k_1(M - \pi_a) \quad \text{eqn S8}$$

216 where  $k_1$  is the rate constant for the inward flux.

217 The flux of solutes out of the guard cell was assumed to be dependent on the level of ABA  
218 within the leaf ( $[ABA]$ ) and  $\pi_a$  by simple mass action. This assumption is analogous to the  
219 activation of outward channels being proportional to  $[ABA]$  and the resulting loss of solutes  
220 occurring by simple collision kinetics. Although in practice efflux kinetics would be much  
221 more complex, the simplest case was used as a first approximation. This gave

$$222 \text{ outward flux} = k_2\pi_a[ABA] \quad \text{eqn S9}$$

223 where  $k_2$  is the rate constant for the outward flux.

224 The equation for osmotic pressure of the guard cell becomes

$$225 \frac{d\pi_a}{dt} = k_1(M - \pi_a) - k_2\pi_a[ABA] \quad \text{eqn S10}$$

226 As mentioned earlier, it could be argued that ABA reduces the osmotic pressure of the guard  
227 cell through either reducing the maximum osmotic pressure obtainable, equivalent to  
228 depolarising the membrane, or through activating efflux channels, or a combination of both.

229 However, upon rearranging eqn S10,

$$230 \frac{d\pi_a}{dt} = (k_1 + k_2[ABA]) \left( \frac{k_1}{k_1 + k_2[ABA]} M - \pi_a \right) \quad \text{eqn S11}$$

231 This is equivalent to ABA reducing the maximum possible osmotic pressure for the guard  
232 cell, while also increasing the rate at which equilibrium is achieved. Thus the two  
233 interpretations are effectively equivalent.



234 In testing the model, inward and outward fluxes and thus the net flux balance was considered  
 235 constant for the short-term dynamics in plant water status. At steady state the flux balance  
 236 gives

$$237 \quad k_1(M - \pi_a) = k_2\pi_a[\text{ABA}] \quad \text{eqn 5}$$

238 which upon rearrangement gives

$$239 \quad \pi_a = \frac{M}{1 + \frac{[\text{ABA}]}{[\text{ABA}]_0}} \quad \text{eqn 6}$$

240 where  $[\text{ABA}]_0$  is the ratio of inward and outward rate constants and is the  $[\text{ABA}]$  where  $\pi_a$  is  
 241 half the maximum value.

242 The goal now is to express eqn 2 in terms of  $g_s$ . Expressing eqn 4 in terms of  $\Psi_l$  and  
 243 substituting into eqn 2, noting that  $\pi_a$  is constant over the short-term dynamics in plant water  
 244 status gives

$$245 \quad \frac{dg_s}{dt} = \frac{\chi K}{c} \left( \frac{M}{1 + \frac{[\text{ABA}]}{[\text{ABA}]_0}} + \Psi_s + d \right) - \frac{1}{c} \left( K + \frac{\chi D}{P_{atm}} \right) g_s \quad \text{eqn 7}$$

246 Steady-state  $g_s$  is obtained by letting  $\frac{dg_s}{dt} = 0$ . For a plant with hydraulic supply connected,  
 247 this gives

$$248 \quad g_s^* = \frac{\chi}{1 + \frac{\chi D}{K P_{atm}}} \left[ \frac{M}{1 + \frac{[\text{ABA}]}{[\text{ABA}]_0}} + \Psi_s + d \right] \quad \text{eqn 8}$$

249 For the case of where hydraulic supply is not connected, such as when a leaf is excised in air,  
 250  $K = 0$  and by inspection of eqn 7 gives a steady state of  $g_s^* = 0$ .

251 For constant plant parameters, eqn 7 is a linear ordinary differential equation for  $g_s$  and gives  
 252 exponentials as analytical solutions

$$253 \quad g_s = g_1 e^{-\frac{t}{c} \left( K + \frac{\chi D}{P_{atm}} \right)} + g_s^* \quad \text{eqn S12}$$

254 where  $g_1$  is a constant with units of conductance, dependent on initial conditions.

255 From eqn S12, it can be seen that the half-time for a dynamic is dependent on two component  
 256 half-times characteristic of hydraulic and evaporative processes respectively. The total  
 257 half-time

258  $t_{1/2 \text{ total}} = \frac{C \ln 2}{\left(K + \frac{\chi D}{P_{atm}}\right)}$  eqn 9

259 is the halftime for a step change in hydraulic supply or demand where the plant is both  
 260 hydraulically connected and transpiring. If the leaf is not transpiring ( $D = 0$ ), such as in the  
 261 rehydration method for determining  $K$  and  $C$  (Blackman and Brodribb, 2011), the halftime  
 262 becomes

263  $t_{1/2 \text{ hydraulic}} = \frac{C}{K} \ln 2$  eqn 10

264 and is denoted here as the hydraulic halftime as it depends only on the hydraulic properties of  
 265 the leaf.

266 If the leaf is transpiring but has no hydraulic supply ( $K = 0$ ), the halftime becomes

267  $t_{1/2 \text{ evaporative}} = \frac{C P_{atm}}{\chi D} \ln 2$  eqn 11

268 and is denoted here as the evaporative halftime as it depends on the evaporative properties of  
 269 the leaf. The total halftime can thus be represented as

270  $t_{1/2 \text{ total}} = \frac{1}{\left(\frac{1}{t_{1/2 \text{ hydraulic}}} + \frac{1}{t_{1/2 \text{ evaporative}}}\right)}$  eqn S13

271 From eqn S13 it can be seen that the total halftime will be less than the two component  
 272 halftimes.

273 The model was tested under two scenarios. In the first, a fully hydrated branch was excised in  
 274 air, cutting off hydraulic supply. As the leaves dried out, stomata closed, before the branch  
 275 was recut underwater to reconnect hydraulic supply. If the initial excision occurred at  $t = 0$ ,  
 276 then  $K = 0$  up until recutting underwater at  $t = t_r$ . For  $t < t_r$ , eqn S12 becomes

277  $g_s = g_s^* e^{-\left(\frac{\chi D}{C P_{atm}}\right)t}$  eqn 12a

278 For  $t > t_r$ , the full form of eqn S12 applies. Matching the boundary condition at  $t = t_r$  gives

279  $g_1 = g_s^* \left( e^{\frac{K}{C} t_r} - e^{\left(\frac{K}{C} + \frac{\chi D}{C P_{atm}}\right) t_r} \right) = -g_s^* e^{\frac{t_r}{C} \left(K + \frac{\chi D}{P_{atm}}\right)} \left( 1 - e^{-\left(\frac{\chi D}{C P_{atm}}\right) t_r} \right)$  eqn S14

280 Substituting into eqn S12 gives, for  $t > t_r$

281 
$$g_s(t) = g_s^* \left\{ 1 - \left[ 1 - e^{-\left(\frac{\chi D}{cP_{atm}}\right)t_r} \right] e^{-\left(\frac{K}{c} + \frac{\chi D}{cP_{atm}}\right)(t-t_r)} \right\}$$
 eqn 12b

282 In the second scenario, branches of droughted plants were rehydrated by excision underwater.  
 283 If the initial  $g_s$  was  $g_{s0}$  and cutting underwater occurred at  $t = 0$ , then

284 
$$g_1 = g_{s0} - g_s^*$$
 eqn S15

285 Substituting into eqn S12 then gives

286 
$$g_s(t) = (g_{s0} - g_s^*)e^{-\left(\frac{K}{c} + \frac{\chi D}{cP_{atm}}\right)t} + g_s^*$$
 eqn 13

287

288 *Hill equation kinetics variant for ABA sensitivity*

289

290 To compare the form used above for  $g_s$  sensitivity to ABA against other similar alternative  
 291 forms, the steady state model was modified to use a general Hill equation form for ABA-  
 292 driven efflux of solutes from the guard cell. In this scenario, the activation of ion channels  
 293 was seen to follow Hill equation kinetics, while the loss of solutes still followed simple mass  
 294 action. Influx of solutes into the guard cell was kept unchanged from the original model.  
 295 Using Hill equation kinetics, the outward flux of solutes can be represented as

296 
$$outward\ flux = \frac{k_3 \pi_a}{\left(\frac{K_A}{[ABA]}\right)^n + 1}$$
 eqn S16

297 where  $k_3$  is the rate constant for efflux,  $K_A$  is the level of ABA where half the channels are  
 298 active and  $n$  is the Hill coefficient. Combining with eqn S8, the equation for balance of  
 299 inward and outward fluxes of solutes becomes

300 
$$k_1(M - \pi_a) = \frac{k_3 \pi_a}{\left(\frac{K_A}{[ABA]}\right)^n + 1}$$
 eqn S17

301 Rearranging, eqn S17 becomes

302 
$$\pi_a = \frac{M}{1 + \frac{k_3/k_1}{\left(\frac{K_A}{[ABA]}\right)^n + 1}}$$
 eqn S18

303 Equation S18 was then substituted in place of the ABA dependence of eqn 8 to yield

$$g_s^* = \frac{\chi}{1 + \frac{\chi D}{K P_{atm}}} \left[ \frac{M}{k_3/k_1} + \Psi_s + d \right] \quad \text{eqn S19}$$

305

306 *Tardieu and Davies model*

307

308 For a comparison of the model with the currently used model for ABA dependence of  $g_s$ , the  
 309 model of Tardieu and Davies (1993) was modified to fit with the experimental test  
 310 conditions. The model of Tardieu and Davies uses an empirical form to relate [ABA] and  $\Psi_l$   
 311 to  $g_s$ :

$$g_s = g_{min} + \alpha \exp(\beta [ABA] \exp(\delta \Psi_l)) \quad \text{eqn S20}$$

313 where  $g_{min}$  is the minimum value for  $g_s$ ,  $\alpha$  is the maximum difference from  $g_{min}$  in the  
 314 absence of ABA,  $\beta$  is the sensitivity to [ABA] and  $\delta$  is the sensitivity to leaf water potential.  
 315 Whereas the original model of Tardieu and Davies took [ABA] to be the concentration of  
 316 ABA in the xylem sap, here it was taken to be the level of ABA in the leaf.

317 The original formulation of the Tardieu and Davies model (Tardieu and Davies, 1993) was  
 318 aimed at steady-state or a quasi-steady state condition. The level of ABA was a flux balance  
 319 of ABA coming into the leaf from the xylem sap, ABA lost through the transpiration stream  
 320 and ABA catabolised:

$$[ABA] = \frac{J_{ABA}}{J+b} \quad \text{eqn S21}$$

322 where  $J_{ABA}$  is the flux of ABA synthesised in the roots,  $J$  ( $= E$  at steady state) is the flux of  
 323 water through the leaf and  $b$  is the flux catabolised.

324 The Tardieu and Davies model was modified to be applicable to the short-term changes in  
 325 plant water relations used to test the hydraulic ABA model. The modified model still  
 326 described the [ABA] in the leaf as a result of a flux balance of ABA transported into the leaf  
 327 by the liquid flux and the loss of ABA through transpiration, but in the non-steady state the  
 328 fluxes were not equal. For short-term changes in plant water relations, changes in plant water  
 329 status were of too short a duration to significantly affect ABA biosynthesis or catabolism,  
 330 thus the rate of catabolism was set to zero. Moreover, as biosynthesis was assumed to be

331 negligible over a similar timeframe, the [ABA] in the xylem sap was assumed to be the same  
 332 as the bulk leaf tissue. The rate of change of [ABA] in the leaf was given by

$$333 \quad \frac{d[ABA]}{dt} = \frac{18}{FWA} (J[ABA]_x - E[ABA]) \quad \text{eqn S22}$$

334 where  $[ABA]_x$  is the level of ABA in the xylem sap and FWA is the fresh weight of leaves  
 335 per unit area ( $\text{g m}^{-2}$ ). The factor 18 ( $\text{g mol}^{-1}$ ) is to convert the molar water fluxes into mass  
 336 fluxes.

337 Modelling plant water relations for the Tardieu and Davies model began at eqn 2. As  $g_s$  in the  
 338 Tardieu and Davies model is no longer a linear function of  $\Psi_l$ , a numerical solution is  
 339 required. Crudely discretising eqn 2 and letting  $\Psi_s = 0$  as was the case for the model tests  
 340 leads to

$$341 \quad \frac{\Psi_{l,t+1} - \Psi_{l,t}}{\Delta t} = \frac{1}{c} \left( -K\Psi_{l,t} - \frac{g_s([ABA], \Psi_{l,t})D}{P_{atm}} \right) \quad \text{eqn S23}$$

342 where  $\Psi_{l,t+1}$  and  $\Psi_{l,t}$  are the next and current values of  $\Psi_l$  respectively,  $\Delta t$  is the time step  
 343 between calculations and  $g_s$  has the Tardieu and Davies form (eqn S20) and is evaluated at  $\Psi_l$   
 344  $t$ . Rearranging gives the iterative solution for  $\Psi_l$  as

$$345 \quad \Psi_{l,t+1} = \Psi_{l,t} + \frac{\Delta t}{c} \left( -K\Psi_{l,t} - \frac{g_s([ABA], \Psi_{l,t})D}{P_{atm}} \right) \quad \text{eqn S24}$$

346 Discretising eqn S22 leads to

$$347 \quad [ABA]_{t+1} = \frac{18\Delta t}{FWA} J[ABA]_x - \left( \frac{18\Delta t}{FWA} E - 1 \right) [ABA]_t \quad \text{eqn S25}$$

348 where  $J$  and  $E$  were calculated using eqn S1 and S2.

349 Initial steady-state  $\Psi_l$  for excision-rehydration kinetics was calculated by iteration using eqn  
 350 S20 and

$$351 \quad \Psi_l = \frac{-g_s D}{K P_{atm}} \quad \text{eqn S26}$$

352 Initial  $\Psi_l$  for rehydration kinetics were calculated by inverting eqn S20:

$$353 \quad \Psi_l = \frac{1}{\delta} \ln \left( \frac{1}{\beta [ABA]} \ln \left( \frac{g_s - g_{min}}{\alpha} \right) \right) \quad \text{eqn S27}$$

354 At the start of both excision-rehydration and rehydration kinetics,  $[ABA]_x$  and  $[ABA]$  were  
 355 assumed to be in equilibrium.

356 Combining eqn S24, S25, the relevant initial condition and evaluating  $g_s$  using eqn S20 at  
357 each time step produced the modelled dynamics for the Tardieu and Davies model, noting  
358 that during dehydration kinetics hydraulic supply was disconnected, i.e.  $K = 0$ .

359

## 360 Literature Cited

361

362 Blackman CJ, Brodribb TJ (2011) Two measures of leaf capacitance: insights into the water  
363 transport pathway and hydraulic conductance in leaves. *Functional Plant Biology* 38: 118-126

364 Brodribb TJ, McAdam SAM (2011) Passive origins of stomatal control in vascular plants.  
365 *Science* 331: 582-585

366 Buckley TN (2005) The control of stomata by water balance. *New Phytologist* 168: 275-291

367 Buckley TN, Mott KA, Farquhar GD (2003) A hydromechanical and biochemical model of  
368 stomatal conductance. *Plant, Cell and Environment* 26: 1767-1785

369 Christmann A, Weiler EW, Steudle E, Grill E (2007) A hydraulic signal in root-to-shoot  
370 signalling of water shortage. *The Plant Journal* 52: 167-174

371 Cowan IR (1972) Oscillations in stomatal conductance and plant functioning associated with  
372 stomatal conductance: observations and a model. *Planta* 106: 185-219

373 Dewar RC (1995) Interpretation of an empirical model for stomatal conductance in terms of  
374 guard cell function. *Plant, Cell and Environment* 18: 365-372

375 Dewar RC (2002) The Ball-Berry-Leuning and Tardieu-Davies stomatal models: synthesis  
376 and extension within a spatially aggregated picture of guard cell function. *Plant, Cell and*  
377 *Environment* 25: 1383-1398

378 Franks PJ, Cowan IR, Farquhar GD (1998) A study of stomatal mechanics using the cell  
379 pressure probe. *Plant, Cell and Environment* 21: 94-100

380 Franks PJ, Farquhar GD (2007) The mechanical diversity of stomata and its significance in  
381 gas-exchange control. *Plant Physiology* 143: 78-87

382 Haefner JW, Buckley TN, Mott KA (1997) A spatially explicit model of patchy stomatal  
383 responses to humidity. *Plant, Cell and Environment* 20: 1087-1097

384 Hills A, Chen ZH, Amtmann A, Blatt MR, Lew VL (2012) OnGuard, a computational  
385 platform for quantitative kinetic modeling of guard cell physiology. *Plant Physiology* 159:  
386 1026-1042

387 Jones HG (1982) 'Plants and microclimate'. Cambridge University Press, Cambridge, UK

388 Kirschbaum MUF, Gross LJ, Pearcy RW (1988) Observed and modeled stomatal responses  
389 to dynamic light environments in the shade plant *Alocasia macrorrhiza*. *Plant, Cell and*  
390 *Environment* 11: 111-121

391 Kollist H, Nuhkat M, Roelfsema MRG (2014) Closing gaps: linking elements that control  
392 stomatal movement. *New Phytologist* 203: 44-62

393 Lawson T (2009) Guard cell photosynthesis and stomatal function. *New Phytologist* 181: 13-  
394 34

395 Martins SCV, McAdam SAM, Deans RM, DaMatta FM, Brodribb TJ (2016) Stomatal  
396 dynamics are limited by leaf hydraulics in ferns and conifers: results from simultaneous  
397 measurements of liquid and vapour fluxes in leaves. *Plant, Cell and Environment* 39: 694-705

398 McAdam SAM, Brodribb TJ (2012) Fern and lycophyte guard cells do not respond to  
399 endogenous abscisic acid. *Plant Cell* 24: 1510-1521

400 McAdam SAM, Brodribb TJ (2014) Separating active and passive influences on stomatal  
401 control of transpiration. *Plant Physiology* 164: 1578-1586

402 Meidner H (1975) Water supply, evaporation, and vapour diffusion in leaves. *Journal of*  
403 *Experimental Botany* 26: 666-672

404 Peak D, Mott KA (2011) A new, vapour-phase mechanism for stomatal responses to  
405 humidity and temperature. *Plant Cell and Environment* 34: 162-178

406 Raschke K (1975) Stomatal action. *Annual Review of Plant Physiology* 26: 309-340

407 Tardieu F, Davies WJ (1993) Integration of hydraulic and chemical signalling in the control  
408 of stomatal conductance and water status of droughted plants. *Plant, Cell and Environment*  
409 16: 341-349

410

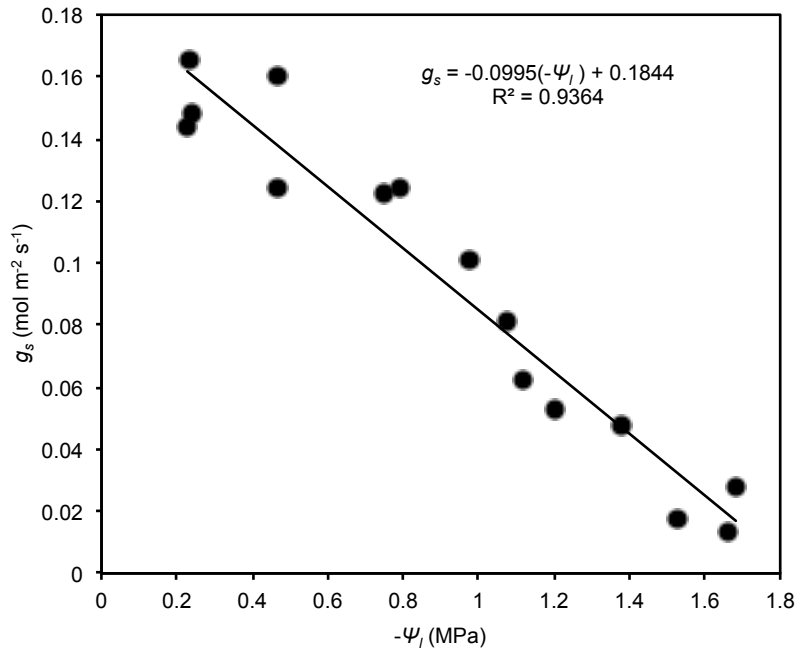

411

412 **Supplemental Figure S1.** The linear range of dependence of stomatal conductance on leaf water  
 413 potential for *M. glyptostroboides*.  $\chi$  was estimated as the slope of the linear line of best fit for stomatal  
 414 conductance vs. leaf water potential. Within this range of water potentials, the assumption that  
 415 stomatal conductance was a linear function of turgor pressure appeared valid.

416

417

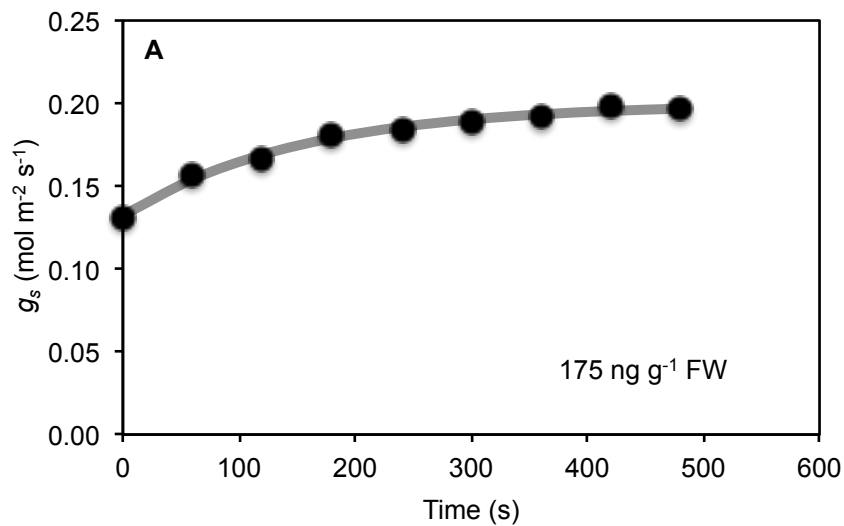

418



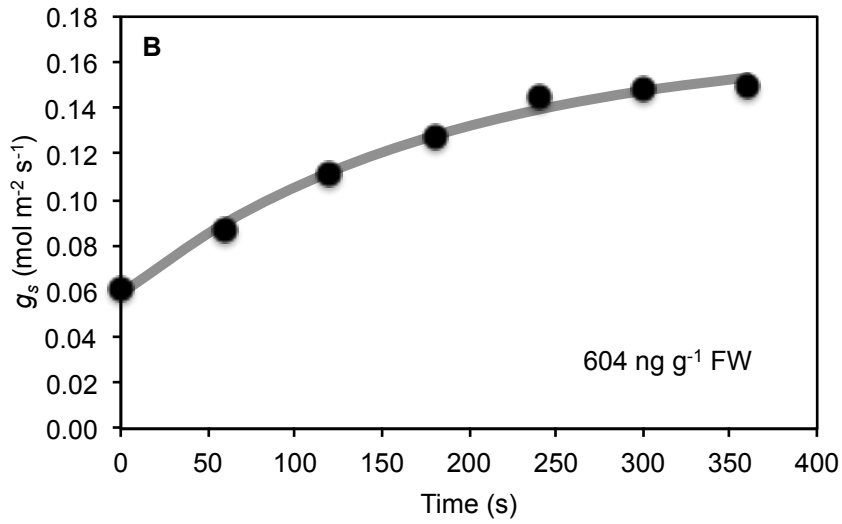

419

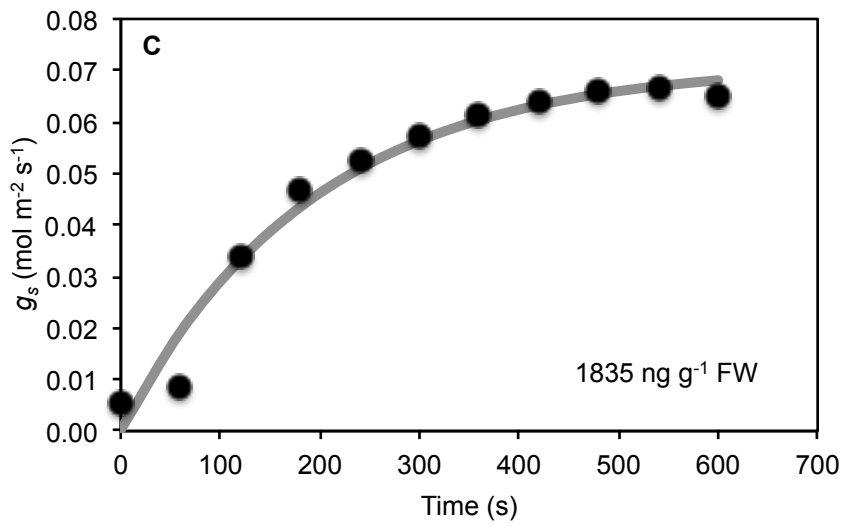

420

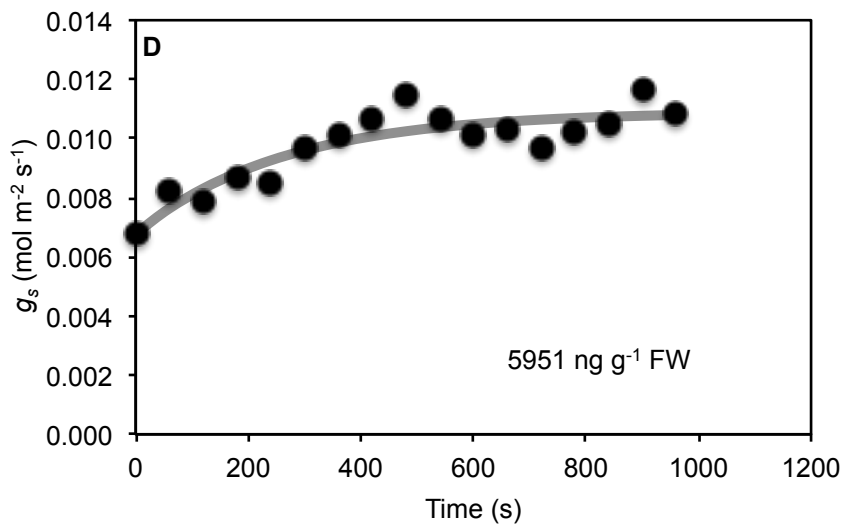

421

422 **Supplemental Figure S2.** Exponential fits to observed kinetics of stomatal conductance recovery  
423 upon recutting underwater, following drought to increase leaf ABA levels. Exponentials fitted the  
424 observed kinetics well at most ABA levels (A, 175 ng g<sup>-1</sup>, R<sup>2</sup> = 0.99; B, 604 ng g<sup>-1</sup>, R<sup>2</sup> = 0.99; C, 1835  
425 ng g<sup>-1</sup>, R<sup>2</sup> = 0.97; A, 5951 ng g<sup>-1</sup>, R<sup>2</sup> = 0.81).

426

427

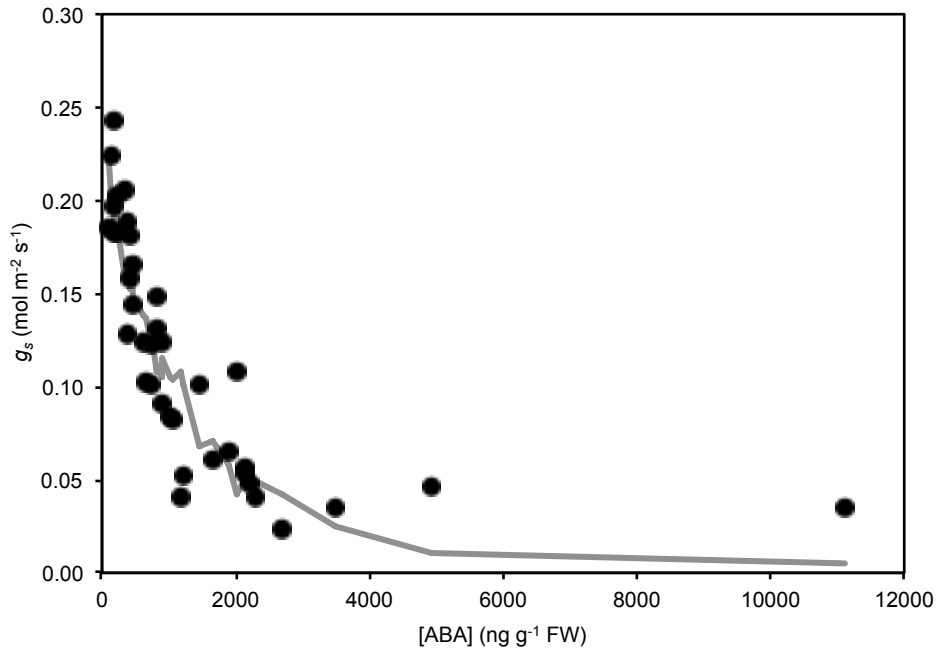

428

429

430 **Supplemental Figure S3.** Tardieu and Davies model (eqn S20) fitted to data from McAdam and  
431 Brodribb (2014), showing the dependence of fully hydrated stomatal conductance on leaf ABA levels  
432 (R<sup>2</sup> = 0.80). A stomatal sensitivity to leaf water potential ( $\delta = -1.2$  MPa<sup>-1</sup>) was selected to best fit  
433 excision-rehydration kinetics. This fit was later used for modelling rehydration kinetics. Other  
434 parameter values for the fit were:  $g_{min} = 0.005$  mol m<sup>-2</sup> s<sup>-1</sup>,  $\alpha = 0.242$  mol m<sup>-2</sup> s<sup>-1</sup>,  $\beta = -0.00064$  g ng<sup>-1</sup>.

435

436

437

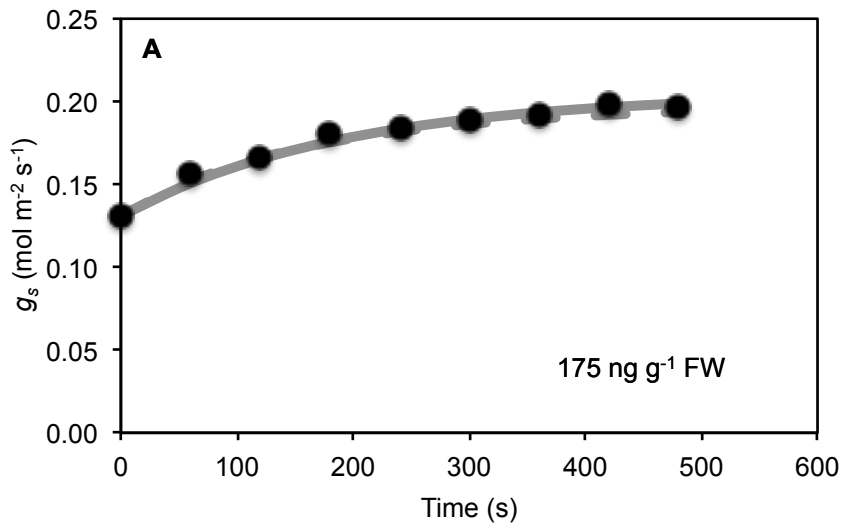

438

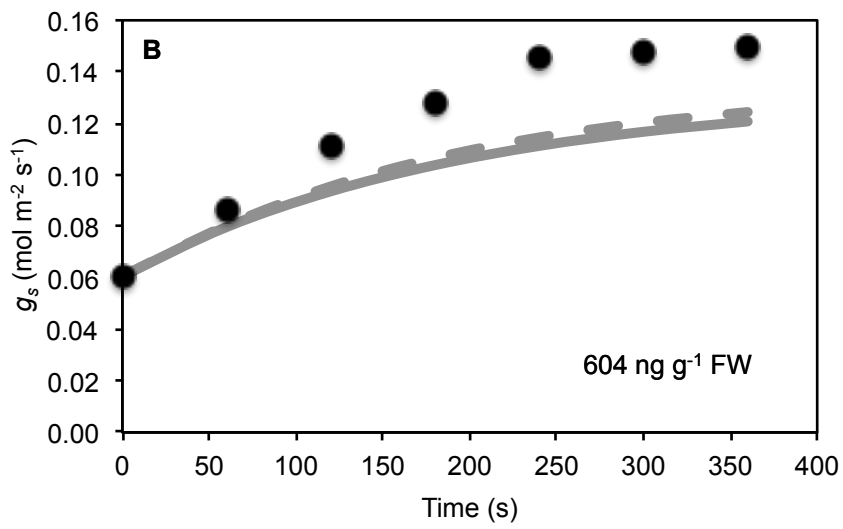

439

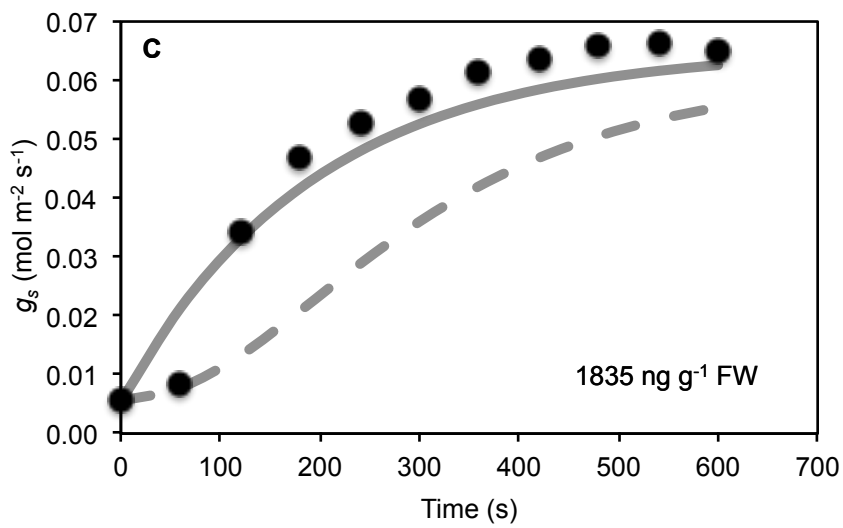

440

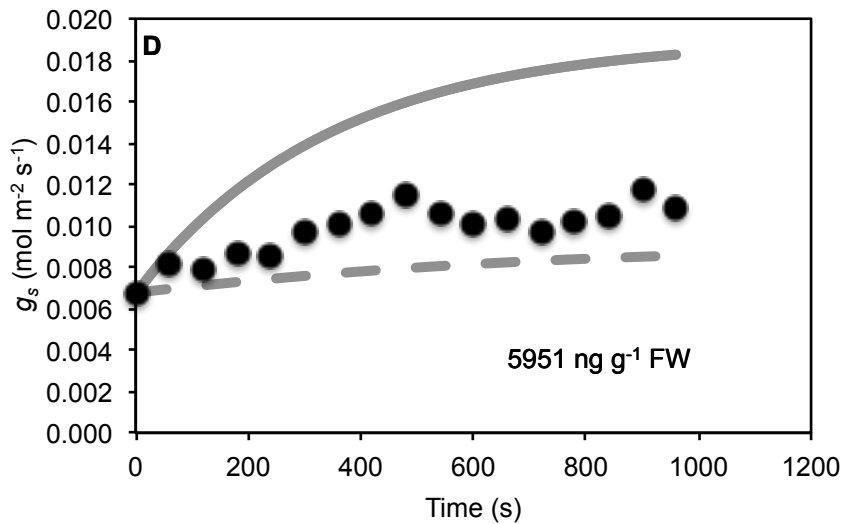

441

442 **Supplemental Figure S4.** Stomatal conductance recovery upon recutting underwater, following  
 443 drought to increase leaf ABA levels, with modelled recovery using the ABA hydraulic model (solid  
 444 grey line) and the Tardieu and Davies model (grey dashed line).

445

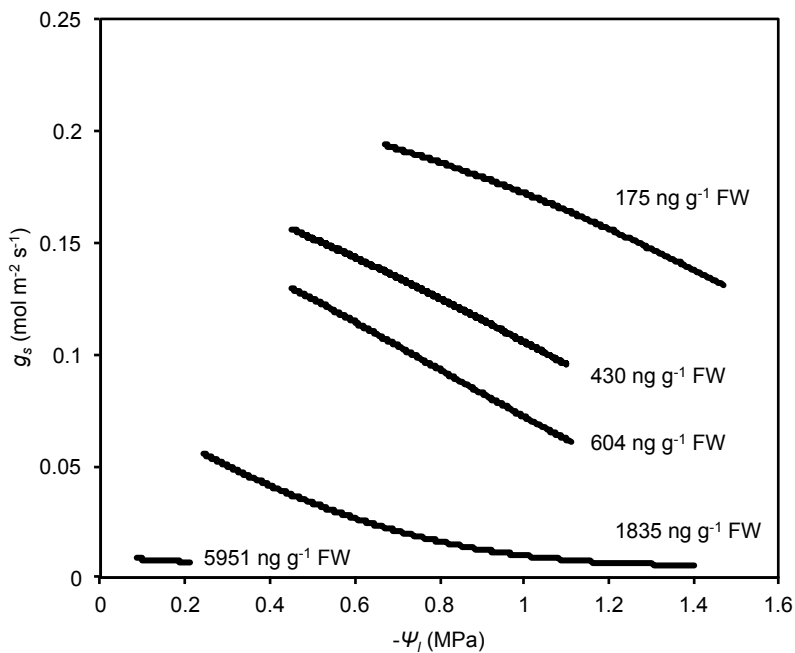

446

447 **Supplemental Figure S5.** Plotted dependence of stomatal conductance on leaf water potential for the  
 448 Tardieu and Davies model with  $\delta = -1.2 \text{ MPa}^{-1}$ , during the simulated excision-rehydration and  
 449 rehydration following drought kinetics at different ABA levels. Within a simulated dynamic using the  
 450 Tardieu and Davies model, [ABA] tended to change by a relatively small amount, while simulated  $\Psi_l$   
 451 changed substantially. The Tardieu and Davies model tended to correspond well with the ABA  
 452 hydraulic model when the  $g_s$  vs.  $\Psi_l$  relationship was approximately linear with the same slope as used

453 in the ABA hydraulic model (i.e. 175 ng g<sup>-1</sup>, 430 ng g<sup>-1</sup> and 604 ng g<sup>-1</sup> cases). Fitting the simulated  $g_s$   
454 vs.  $\Psi_l$  relationship from the Tardieu and Davies model with a linear line of best fit gave: 175 ng g<sup>-1</sup>:  $\chi$   
455 = 0.0755 mol m<sup>-2</sup> s<sup>-1</sup> MPa<sup>-1</sup>, R<sup>2</sup> = 0.994; 430 ng g<sup>-1</sup>:  $\chi$  = 0.0949 mol m<sup>-2</sup> s<sup>-1</sup> MPa<sup>-1</sup>, R<sup>2</sup> = 0.996; 604 ng  
456 g<sup>-1</sup>:  $\chi$  = 0.105 mol m<sup>-2</sup> s<sup>-1</sup> MPa<sup>-1</sup>, R<sup>2</sup> = 0.999; 1835 ng g<sup>-1</sup>:  $\chi$  = 0.0503 mol m<sup>-2</sup> s<sup>-1</sup> MPa<sup>-1</sup>, R<sup>2</sup> = 0.928;  
457 5951 ng g<sup>-1</sup>:  $\chi$  = 0.0144 mol m<sup>-2</sup> s<sup>-1</sup> MPa<sup>-1</sup>, R<sup>2</sup> = 0.995.
